# Supplementary material for: Identification of Mycobacterium abscessus using the peaks of ribosomal protein L29, L30 and hemophore-related protein by MALDI-MS proteotyping
Source: PubMed Central journal article supplement (PMC11099050; doi:10.1038/s41598-024-61549-7), 2024-05-16
Supplement: 41598_2024_61549_MOESM1_ESM.pdf [file 41598_2024_61549_MOESM1_ESM.pdf]

**Table S1** Subspecies identification based on ANI, 16S rRNA, *rpoB*, *hsp65*, and *erm(41)* genes using whole genome sequencing

|                                               | ANI                     |                       |                         | 16S rRNA                |                       |                         | <i>rpoB</i>             |                       |                         | <i>hsp65</i>            |                       |                         | <i>erm(41)</i> |
|-----------------------------------------------|-------------------------|-----------------------|-------------------------|-------------------------|-----------------------|-------------------------|-------------------------|-----------------------|-------------------------|-------------------------|-----------------------|-------------------------|----------------|
|                                               | <i>M. absces</i>        | <i>M. absce</i>       | <i>M. abscess</i>       | <i>M. absces</i>        | <i>M. absce</i>       | <i>M. abscess</i>       | <i>M. absces</i>        | <i>M. absce</i>       | <i>M. abscess</i>       | <i>M. absces</i>        | <i>M. absce</i>       | <i>M. abscess</i>       |                |
| Subspecies <sup>a</sup>                       | <i>sus</i>              | <i>ssus</i>           | <i>us</i>               | <i>sus</i>              | <i>ssus</i>           | <i>us</i>               | <i>sus</i>              | <i>ssus</i>           | <i>us</i>               | <i>sus</i>              | <i>ssus</i>           | <i>us</i>               |                |
|                                               | subsp.                  | subsp.                | subsp.                  | subsp.                  | subsp.                | subsp.                  | subsp.                  | subsp.                | subsp.                  | subsp.                  | subsp.                | subsp.                  |                |
|                                               | <i>absces</i>           | <i>bolleti</i>        | <i>massilie</i>         | <i>absces</i>           | <i>bolleti</i>        | <i>massilie</i>         | <i>absces</i>           | <i>bolleti</i>        | <i>massilie</i>         | <i>absces</i>           | <i>bolleti</i>        | <i>massilie</i>         |                |
|                                               | <i>sus</i> <sup>T</sup> | <i>i</i> <sup>T</sup> | <i>nse</i> <sup>T</sup> | <i>sus</i> <sup>T</sup> | <i>i</i> <sup>T</sup> | <i>nse</i> <sup>T</sup> | <i>sus</i> <sup>T</sup> | <i>i</i> <sup>T</sup> | <i>nse</i> <sup>T</sup> | <i>sus</i> <sup>T</sup> | <i>i</i> <sup>T</sup> | <i>nse</i> <sup>T</sup> |                |
| <i>M. abscessus</i> subsp. <i>abscessus</i>   | 91.5-99.9               | 76.4-78.2             | 75.3-77.4               | 100                     | 100                   | 100                     | 100                     | 96.58                 | 97.31                   | 100                     | 98.5                  | 98.75                   | full           |
| <i>M. abscessus</i> subsp. <i>massiliense</i> | 75.9-78.7               | 73-74.8               | 89.1-95.57              | 100                     | 100                   | 100                     | 97.31                   | 98.29                 | 100                     | 98.75                   | 99.25                 | 100                     | deletion       |

<sup>a</sup> clinical isolates of *M. abscessus* subspecies

**TABLE S2** Summary of the characteristics of 33 isolates of *Mycobacterium abscessus*

| Isolates | Isolation date | Subspecies                                    | MIC ( $\mu\text{g/ml}$ ) |             |          | Drug resistant mutations |                 |            |
|----------|----------------|-----------------------------------------------|--------------------------|-------------|----------|--------------------------|-----------------|------------|
|          |                |                                               | Clarithromycin           |             | Amikacin | Imipenem                 |                 |            |
|          |                |                                               | day5                     | day14       | day5     | day5                     | <i>erm</i> (41) | <i>rhl</i> |
| M3       | March 2014     | <i>M. abscessus</i> subsp. <i>abscessus</i>   | 1                        | 128         | 8        | 16                       | T28             | -          |
| M4       | May 2017       | <i>M. abscessus</i> subsp. <i>abscessus</i>   | 0.25                     | >128        | 16       | 8                        | T28             | -          |
| M5       | July 2015      | <i>M. abscessus</i> subsp. <i>massiliense</i> | >128                     | >128        | 16       | 16                       | T28             | a2058c     |
| M6       | May 2017       | <i>M. abscessus</i> subsp. <i>massiliense</i> | $\leq 0.06$              | $\leq 0.06$ | 8        | 8                        | T28             | -          |
| M7       | August 2016    | <i>M. abscessus</i> subsp. <i>abscessus</i>   | 0.5                      | 128         | 8        | 16                       | T28             | -          |
| M8       | April 2016     | <i>M. abscessus</i> subsp. <i>massiliense</i> | $\leq 0.06$              | $\leq 0.06$ | 8        | 8                        | T28             | -          |
| M10      | June 2014      | <i>M. abscessus</i> subsp. <i>abscessus</i>   | 0.25                     | 128         | 8        | 8                        | T28             | -          |
| M11      | May 2017       | <i>M. abscessus</i> subsp. <i>massiliense</i> | $\leq 0.06$              | 0.125       | 8        | 16                       | T28             | -          |
| M13      | May 2017       | <i>M. abscessus</i> subsp. <i>massiliense</i> | $\leq 0.06$              | $\leq 0.06$ | 16       | 16                       | T28             | -          |
| M14      | December 2013  | <i>M. abscessus</i> subsp. <i>abscessus</i>   | 0.125                    | 16          | 8        | 8                        | T28             | -          |
| M15      | October 2015   | <i>M. abscessus</i> subsp. <i>massiliense</i> | >128                     | >128        | 8        | 2                        | T28             | a2058c     |
| M16      | April 2016     | <i>M. abscessus</i> subsp. <i>abscessus</i>   | 0.25                     | 4           | 16       | 4                        | T28             | -          |
| M19      | April 2017     | <i>M. abscessus</i> subsp. <i>abscessus</i>   | $\leq 0.06$              | $\leq 0.06$ | 8        | 16                       | C28             | -          |
| M20      | June 2013      | <i>M. abscessus</i> subsp. <i>abscessus</i>   | 0.125                    | 32          | 4        | 4                        | T28             | -          |
| M23      | February 2012  | <i>M. abscessus</i> subsp. <i>abscessus</i>   | >128                     | >128        | 8        | 8                        | T28             | -          |
| M26      | May 2016       | <i>M. abscessus</i> subsp. <i>massiliense</i> | $\leq 0.06$              | $\leq 0.06$ | 16       | 16                       | T28             | -          |
| M27      | May 2017       | <i>M. abscessus</i> subsp. <i>massiliense</i> | $\leq 0.06$              | $\leq 0.06$ | 8        | 16                       | T28             | -          |
| M28      | October 2016   | <i>M. abscessus</i> subsp. <i>massiliense</i> | $\leq 0.06$              | $\leq 0.06$ | 4        | 4                        | T28             | -          |
| M29      | November 2016  | <i>M. abscessus</i> subsp. <i>massiliense</i> | $\leq 0.06$              | 0.25        | 8        | 16                       | T28             | -          |
| M30      | April 2016     | <i>M. abscessus</i> subsp. <i>massiliense</i> | $\leq 0.06$              | $\leq 0.06$ | 16       | 16                       | T28             | -          |
| M32      | October 2016   | <i>M. abscessus</i> subsp. <i>massiliense</i> | $\leq 0.06$              | $\leq 0.06$ | 16       | 8                        | T28             | -          |
| M33      | February 2018  | <i>M. abscessus</i> subsp. <i>abscessus</i>   | 0.125                    | 128         | 8        | 8                        | T28             | -          |
| M34      | June 2018      | <i>M. abscessus</i> subsp. <i>abscessus</i>   | $\leq 0.06$              | $\leq 0.06$ | 8        | 8                        | C28             | -          |

|     |               |                                               |       |       |       |       |     |   |
|-----|---------------|-----------------------------------------------|-------|-------|-------|-------|-----|---|
| M36 | December 2018 | <i>M. abscessus</i> subsp. <i>massiliense</i> | ≤0.06 | ≤0.06 | 8     | 16    | T28 | - |
| M37 | November 2018 | <i>M. abscessus</i> subsp. <i>massiliense</i> | ≤0.06 | ≤0.06 | 8     | 8     | T28 | - |
| M38 | December 2018 | <i>M. abscessus</i> subsp. <i>massiliense</i> | ≤0.06 | ≤0.06 | 0.125 | ≤0.06 | T28 | - |
| M39 | March 2018    | <i>M. abscessus</i> subsp. <i>massiliense</i> | ≤0.06 | ≤0.06 | 8     | 4     | T28 | - |
| M40 | January 2019  | <i>M. abscessus</i> subsp. <i>massiliense</i> | ≤0.06 | ≤0.06 | 8     | 8     | T28 | - |
| M41 | June 2019     | <i>M. abscessus</i> subsp. <i>massiliense</i> | ≤0.06 | ≤0.06 | 8     | 8     | T28 | - |
| M42 | February 2018 | <i>M. abscessus</i> subsp. <i>massiliense</i> | ≤0.06 | ≤0.06 | 2     | 2     | T28 | - |
| M43 | June 2019     | <i>M. abscessus</i> subsp. <i>massiliense</i> | ≤0.06 | ≤0.06 | 8     | 8     | T28 | - |
| M44 | July 2019     | <i>M. abscessus</i> subsp. <i>massiliense</i> | ≤0.06 | ≤0.06 | 8     | 4     | T28 | - |
| M45 | October 2019  | <i>M. abscessus</i> subsp. <i>massiliense</i> | ≤0.06 | ≤0.06 | 8     | 8     | T28 | - |

---

**TABLE S3** Annotated peaks of type strains of *Mycobacterium abscessus* cultured in 5% sheep blood agar by MALDI-8020

| Biomarker proteins        | Subspecies                                                                     |         |      |                    |                                                                              |         |      |                    |                                                                                 |         |      |                    |
|---------------------------|--------------------------------------------------------------------------------|---------|------|--------------------|------------------------------------------------------------------------------|---------|------|--------------------|---------------------------------------------------------------------------------|---------|------|--------------------|
|                           | <i>Mycobacterium abscessus</i> subsp. <i>abscessus</i> ATCC 19977 <sup>T</sup> |         |      |                    | <i>Mycobacterium abscessus</i> subsp. <i>bolletii</i> JCM 15297 <sup>T</sup> |         |      |                    | <i>Mycobacterium abscessus</i> subsp. <i>massiliense</i> JCM 15300 <sup>T</sup> |         |      |                    |
|                           | Calculated masses (m/z)                                                        | Average | SE   | Peak numbers (n=5) | Calculated masses (m/z)                                                      | Average | SE   | Peak numbers (n=5) | Calculated masses (m/z)                                                         | Average | SE   | Peak numbers (n=5) |
| L29                       | 8780.9                                                                         | 8780.4  | 0.19 | 5                  | 8780.9                                                                       | 8780.6  | 0.17 | 5                  | 8766.9                                                                          | 8767.1  | 0.23 | 5                  |
| L30                       | 6795.9                                                                         | 6795.8  | 0.09 | 5                  | 6765.9                                                                       | 6766.4  | 0.04 | 5                  | 6795.9                                                                          | 6795.9  | 0.22 | 5                  |
| hemophore-related protein | 9473.8                                                                         | 9472.4  | 0.07 | 5                  | 9473.8                                                                       | 9472.6  | 0.18 | 5                  | 9500.3                                                                          | 9501.0  | 0.29 | 5                  |

**TABLE S4** Annotated peaks type strains of *Mycobacterium abscessus* cultured in 7H11 agar analyzed by Microflex LT/SH

| Biomarker proteins        | Subspecies                                                                     |         |      |                    |                                                                              |         |      |                    |                                                                                 |         |      |                    |
|---------------------------|--------------------------------------------------------------------------------|---------|------|--------------------|------------------------------------------------------------------------------|---------|------|--------------------|---------------------------------------------------------------------------------|---------|------|--------------------|
|                           | <i>Mycobacterium abscessus</i> subsp. <i>abscessus</i> ATCC 19977 <sup>T</sup> |         |      |                    | <i>Mycobacterium abscessus</i> subsp. <i>bolletii</i> JCM 15297 <sup>T</sup> |         |      |                    | <i>Mycobacterium abscessus</i> subsp. <i>massiliense</i> JCM 15300 <sup>T</sup> |         |      |                    |
|                           | Calculated masses (m/z)                                                        | Average | SE   | Peak numbers (n=5) | Calculated masses (m/z)                                                      | Average | SE   | Peak numbers (n=5) | Calculated masses (m/z)                                                         | Average | SE   | Peak numbers (n=5) |
| L29                       | 8780.9                                                                         | 8781.0  | 0.28 | 5                  | 8780.9                                                                       | 8780.6  | 0.47 | 5                  | 8766.9                                                                          | 8768.3  | 0.30 | 5                  |
| L30                       | 6795.9                                                                         | 6796.6  | 0.10 | 5                  | 6765.9                                                                       | 6767.2  | 0.29 | 5                  | 6795.9                                                                          | 6797.4  | 0.23 | 5                  |
| hemophore-related protein | 9473.8                                                                         | 9473.1  | 0.23 | 5                  | 9473.8                                                                       | 9472.9  | 0.37 | 5                  | 9500.3                                                                          | 9502.1  | 0.38 | 5                  |

**TABLE S5** Assembly summary report of 33 *M. abscessus* isolates

| Strains | Accession No. | Reads (bp) | Coverage | Contigs | Completeness | Contamination | Contig_N50 |
|---------|---------------|------------|----------|---------|--------------|---------------|------------|
| M3      | SAMD00579515  | 657495000  | 131.0    | 99      | 100          | 0.35          | 124111     |
| M4      | SAMD00579516  | 198122000  | 39.5     | 106     | 100          | 0.42          | 98096      |
| M5      | SAMD00579517  | 190007000  | 38.5     | 67      | 100          | 0.27          | 131541     |
| M6      | SAMD00579518  | 157454000  | 31.9     | 91      | 100          | 0.18          | 118404     |
| M7      | SAMD00579519  | 243205000  | 48.4     | 84      | 100          | 0.69          | 184713     |
| M8      | SAMD00579520  | 186904000  | 37.9     | 100     | 100          | 0.18          | 97993      |
| M10     | SAMD00579521  | 142809000  | 28.4     | 130     | 100          | 0.35          | 94441      |
| M11     | SAMD00579522  | 207484000  | 42.1     | 174     | 99.97        | 0.27          | 134295     |
| M13     | SAMD00579523  | 180423000  | 36.6     | 110     | 100          | 0.24          | 103151     |
| M14     | SAMD00579524  | 225807000  | 45.0     | 92      | 99.99        | 0.38          | 105767     |
| M15     | SAMD00579525  | 248498000  | 50.4     | 72      | 100          | 0.74          | 132833     |
| M16     | SAMD00579526  | 168764000  | 33.6     | 114     | 99.99        | 0.63          | 98330      |
| M19     | SAMD00579527  | 214400000  | 42.7     | 90      | 100          | 0.74          | 100560     |
| M20     | SAMD00579528  | 134439000  | 26.8     | 171     | 100          | 0.43          | 64694      |
| M23     | SAMD00579529  | 258753000  | 51.5     | 74      | 100          | 0.3           | 117901     |
| M26     | SAMD00579530  | 219897000  | 44.6     | 91      | 100          | 1.52          | 116993     |
| M27     | SAMD00579531  | 147412000  | 29.9     | 229     | 99.73        | 0.37          | 67341      |
| M28     | SAMD00579532  | 183780000  | 37.3     | 166     | 100          | 0.18          | 99111      |
| M29     | SAMD00579533  | 239480000  | 48.6     | 114     | 100          | 0.31          | 109330     |

|     |              |           |      |     |       |      |        |
|-----|--------------|-----------|------|-----|-------|------|--------|
| M30 | SAMD00579534 | 227198000 | 46.1 | 75  | 100   | 0.19 | 136418 |
| M32 | SAMD00579535 | 225434000 | 45.7 | 99  | 99.99 | 0.19 | 112641 |
| M33 | SAMD00579536 | 196673000 | 39.2 | 119 | 100   | 0.55 | 107106 |
| M34 | SAMD00579537 | 173890000 | 34.6 | 137 | 100   | 0.25 | 120369 |
| M36 | SAMD00579538 | 247069000 | 50.1 | 71  | 100   | 0.29 | 132334 |
| M37 | SAMD00579539 | 218580000 | 44.3 | 53  | 100   | 0.23 | 145475 |
| M38 | SAMD00579540 | 232395000 | 47.1 | 94  | 100   | 0.42 | 127101 |
| M39 | SAMD00579541 | 252511000 | 51.2 | 78  | 100   | 0.23 | 142937 |
| M40 | SAMD00579542 | 247147000 | 50.1 | 127 | 100   | 0.26 | 118863 |
| M41 | SAMD00579543 | 182194000 | 36.9 | 123 | 100   | 0.36 | 121499 |
| M42 | SAMD00579544 | 264464000 | 53.6 | 79  | 100   | 0.82 | 128982 |
| M43 | SAMD00579545 | 189489000 | 38.4 | 95  | 100   | 0.22 | 130554 |
| M44 | SAMD00579546 | 230135000 | 46.7 | 84  | 100   | 0.21 | 118308 |
| M45 | SAMD00579547 | 398175000 | 80.7 | 101 | 100   | 0.39 | 152882 |

---
